# Supplementary material for: The Mesolevel Economy in Nineteenth-Century England and Wales: Applying Input-Output Accounting and Spatial Interaction Modelling to the Historical Study
Source: Hindawi journal article supplement (doi:10.1155/2024/3016105), 2024-03-28
Supplement: f1 [file 3016105.f1.docx]

# A1. Moving to dynamics

Section 2 outlined a ‘steady state’ implementation of the model.In this appendix,wediscuss how the model can instead be implemented with dynamic elements. Firstly, we specify some further variables – in addition to those given in **Figure 2**:

- = the capacity for producing in , and = the unconstrained demand for in . Note that in any implementation the actual production must be less than or equal to maximum capacity, . is what would be generated in the dynamic model if this constraint was not in place.
- = the investment in in
- = land used in city for the production of sector , and = the unit ‘rent’ for this

We can then adapt **Figure 3**, as below:

| Variable | Observable aspects | Representation |
| --- | --- | --- |
| Technology (both as exogenous change, and the *possibility* of exogenous change) | Machinery and mechanisation | Changing coefficients.  Changing . |
| Industrial concentration and development | Changing . |
| Infrastructure: transport (e.g. roads, canals, railways) | Changing unit costs ( ) for mode , with ‘mean’ .  Changing . |
| Infrastructure: construction and utilities | Changing where = construction or utilities. Under some circumstances construction can be considered as part of the costs of supply, hence why this is represented in the term  Changing . |
| Demographic characteristics and change | Age structure and mortality | Sub-model for , and sub-factors (e.g. ageing population, skill/human capital changes).  A future integration of a migration sub-model. |
| Regional concentration |
| Migration |
| The economy | Employment | Sub-model for  Mainly represented through but also through known quantities such as and .  represents unit prices for supplies to and can be used to add to the cost of a unit of production of using . |
| Income |
| Prices |
| Trade |
| Provision and organisation of services | Number, size, and clustering of firms | Through for the service sectors.  Through where = services.    Development of infrastructure associated with . |
| Cost, frequency, and form of passenger transport |
| Newspaper (and other) advertising |
| Technological impacts on agriculture | Yields-per-acre | Through where = agriculture.  where = agriculture (in combination with ). |
| Productivity per worker |
| Parliamentary enclosure |
| Changes in crop rotations |
| Arable: pasture ratio |
| Organisation of industry | Factory system | Through . |
| Wheat storage |
| Urban form | City boundaries | Through and .  Where exhibits significant clustering. |
| Land use |
| Regional specialisation |
| Government | Central (e.g. legislation, parliamentary commissions) | Through and taxes. There may need to be a distinction made here between regulated (government supplied – schools, health etc) and unregulated (retail, etc). |
| Local |

Whilst we presently treat each of the time points considered above as independent, they can be considered as have an implicit time label – for example, . However, to model change, we need to be more explicit in the specification of increment: , and as the change in in the period to . To make the model fully dynamic, one or more of the key variables needs to endogenously respond to the dynamics between these time points. In the case of , this can be achieved by:

|  |  | (A.1) |
| --- | --- | --- |

with a measure of demand:

|  |  | (A.2) |
| --- | --- | --- |

and the unit cost, as:

|  |  | (A.3) |
| --- | --- | --- |

Having made the relevant variables endogenous, the model can then be run dynamically by the following procedure:

1. Set the initial conditions of all variables
2. Specify the values of the changing exogenous variables over time – in other words, the drivers
3. Run the model for to establish the equilibrium base
4. For the variables calculated for time become the initial conditions for the cycle
   1. Specify the exogenous variables for
   2. Calculate from equations (A.1), (A.2), and (A.3)
   3. Adjust for key constraints:
   4. Collect together as initial conditions for cycle
5. Repeat for

It should therefore be noted that the current (‘static’) implementation largely covers steps 1, 2 and 3; adapt this framework to incorporate steps 4 and 5 requires further data and model development, but is achievable within our existing framework.

# A2. Demographic weightings

### , or ‘equivalent labour value’, is a measure of population () weighted for demographic values (). It adjusts for the demographic composition of those employed in the labour force, and the expected productive output for each demographic group. The weightings provided here are constant and sector agnostic. There is a significant literature concerning the relative productivity of different demographic groups during the British Industrial Revolution (and how this might have evolved over the period). Future work may introduce weightings by sector to better represent inter-industry variation (as a consequence of the type of work, or incorporation of machinery).

Unknown sex is significantly less prevalent after the 1851 census, but are weighted as female here. Unknown ages are more difficult to incorporate, but form a relatively small proportion of the total. Both are a result of the census recording or transcription process.

| Labour value weightings () | Male | Female | Unknown sex |
| --- | --- | --- | --- |
| Adult | 1 | 0.8 | 0.8 |
| Child (<16 years) | 0.5 | 0.4 | 0.4 |
| Unknown age | 0.7 | 0.6 | 0.6 |
